# Supplementary material for: Efficient water-mediated synthesis of bismuth oxyiodide with several distinct morphologies
Source: Royal Society of Chemistry journal article supplement (doi:10.1039/c9ce01835b), 2020-01-01
Supplement: c9ce01835b1.pdf [file c9ce01835b1.pdf]

## SUPPLEMENTARY INFORMATION

### Water-Mediated Efficient Synthesis of Bismuth Oxyiodide for Several Distinct Morphologies

Yang Long<sup>a</sup>, Siyuan Tan<sup>a</sup>, Qiang Han<sup>a</sup>, Yongjian Ai<sup>a</sup>, Yuqiang Sheng<sup>a</sup>, Yi Wang<sup>\*b</sup>, Haibo Wang<sup>c</sup>,  
Youliang Xie<sup>d</sup>, Qionglin Liang<sup>\*a</sup>, Mingyu Ding<sup>\*a</sup>

a: MOE Key Laboratory of Bioorganic Phosphorus Chemistry & Chemical Biology; Department of Chemistry, Center for Synthetic and Systems Biology, Tsinghua University, Beijing, 100089, P. R. China.

b: Key Laboratory of Marine Environmental Corrosion and Bio-fouling, Institute of Oceanology, Chinese Academy of Sciences, Qingdao, 266071, P. R. China.

c: School of Pharmaceutical sciences, Liaoning University of Traditional Chinese Medicine, Dalian 116600, P. R. China.

d: Mathematical Engineering Academy of Chinese Medicine, Guangzhou University of Chinese Medicine, Guangzhou 510006, P. R. China.

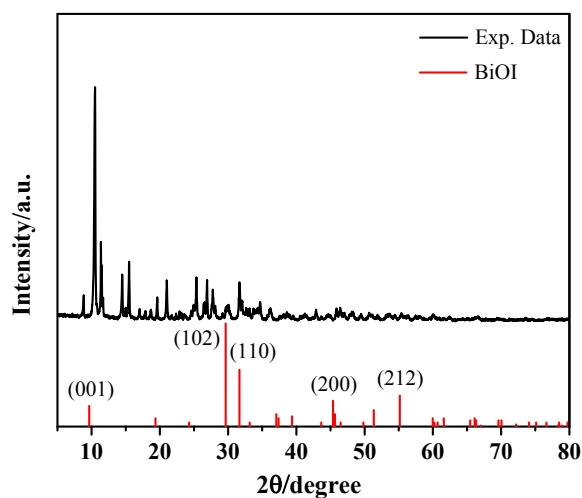

Figure S1, XRD patterns of the products prepared without reaction water.

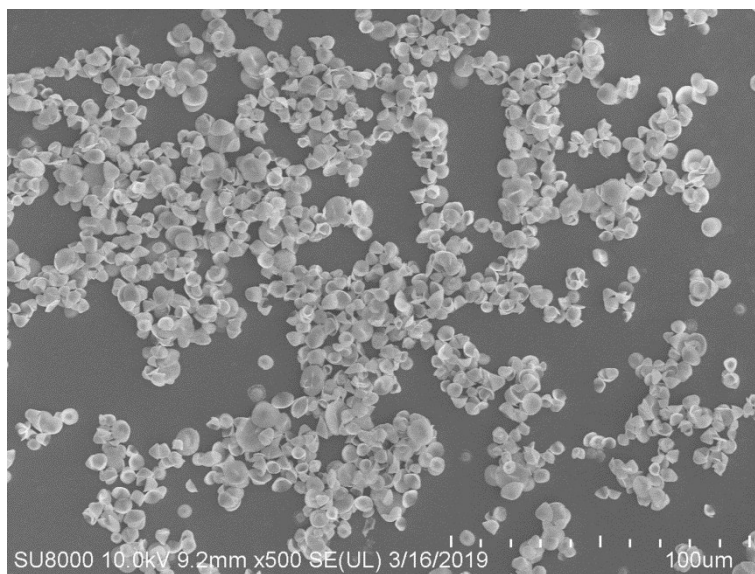

Figure S2, SEM image of the products prepared at 2.5 mL of reaction water.

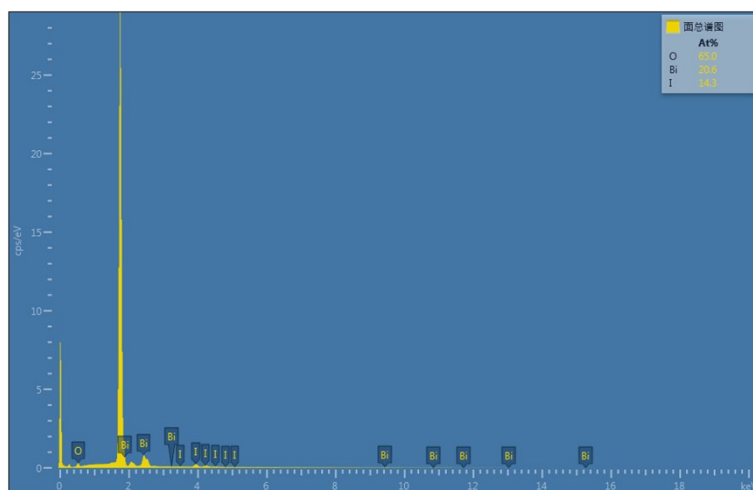

Figure S3, EDS analysis of bowl-like BiOI microstructures
